# Supplementary material
Source: Springer Nature journal article supplement (https://www.springermedizin.de/resource/supplementary/12885_2011_2841_MOESM3_ESM.pdf/9462164)

# Adhesion to HUVEC

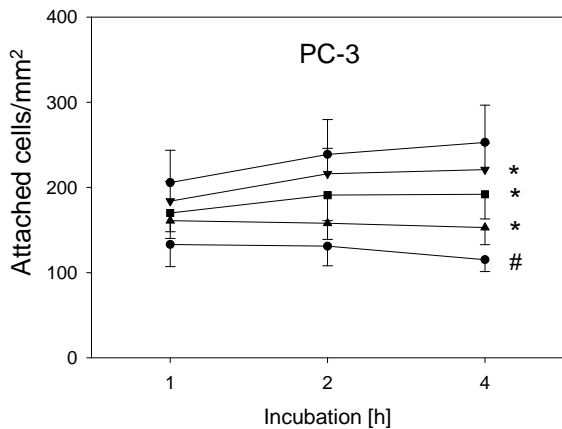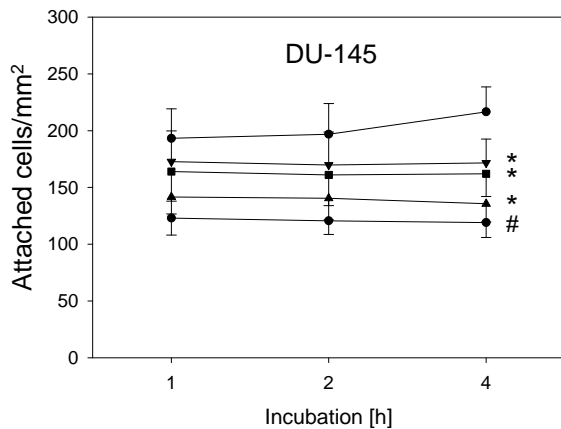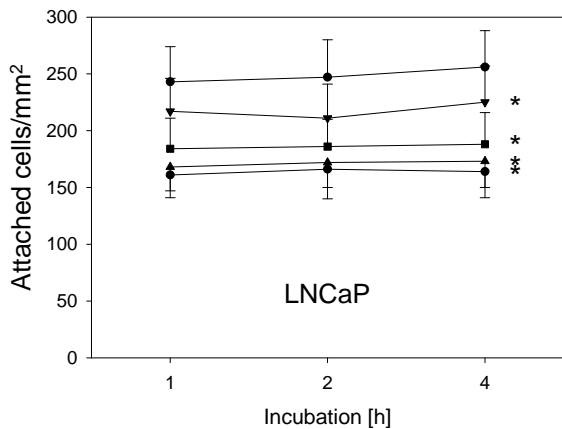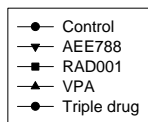

Supplement: MOESM3 [file 9462164]
